# Supplementary material
Source: Royal Society of Chemistry journal article supplement (doi:10.1039/d6nr00881j)
Supplement: d6nr00881j1.pdf [file d6nr00881j1.pdf]

## Electronic Supplementary Information

---

### **A flexible and free-standing multifunctional membrane for high-efficiency wastewater purification and oil/water separation with superhigh flux and ultralow fouling**

**Peng Gao,<sup>a</sup> Jian Gao,<sup>b</sup> and Darren Delai Sun<sup>\*a</sup>**

<sup>a</sup>School of Civil and Environmental Engineering, Nanyang Technological University,

50 Nanyang Avenue, Singapore 639798, Singapore

<sup>b</sup>School of Chemistry and Chemical Engineering, Zhejiang Sci-Tech University,

No. 928, 2nd Street, Xiasha Higher Education Park, Qiantang District, Hangzhou City,

Zhejiang Province, China

**Corresponding author:** Darren Delai Sun, Email: [DDSUN@ntu.edu.sg](mailto:DDSUN@ntu.edu.sg), Tel:

+6567906273, Fax: +65 6791 0676.

## Electronic Supplementary Information

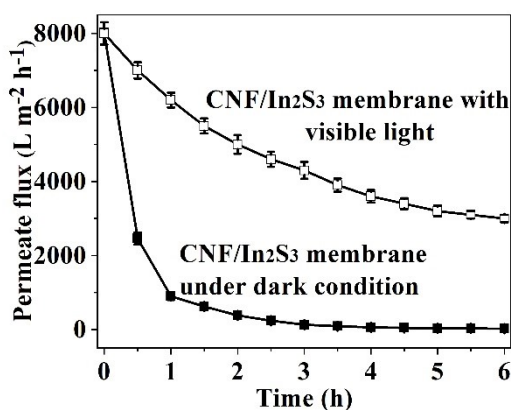

**Fig. S1.** Long-term permeate flux of CNF/In<sub>2</sub>S<sub>3</sub> membranes under dark condition and visible light during 6 h.

**Explanation:** Fig. S1 shows long-term permeate flux of CNF/In<sub>2</sub>S<sub>3</sub> membranes under dark condition and visible light during 6 h under 0.6 bar. It can be observed that the permeate flux declines rapidly in the first 2 h when CNF/In<sub>2</sub>S<sub>3</sub> membranes were put tested under dark condition, and the flux reaches around zero due to the severe membrane fouling caused by HA. However, CNF/In<sub>2</sub>S<sub>3</sub> membranes under visible light can maintain relative high permeate flux (ca. 3000 L/m<sup>2</sup>·h), even after 6 h, indicating the high stability of CNF/In<sub>2</sub>S<sub>3</sub> membranes.

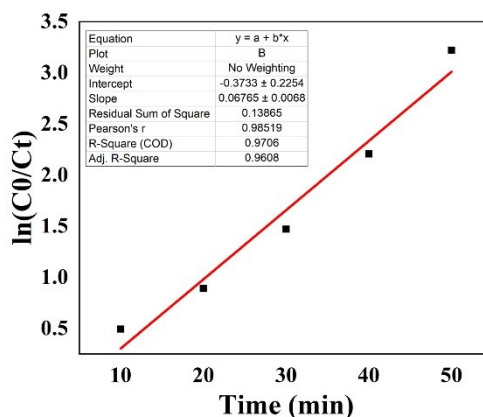

**Fig. S2.** First order kinetic equation  $\ln(C_0/C_t) = kt$  of CNF/In<sub>2</sub>S<sub>3</sub> membranes under visible light.

**Explanation:** According to the first order kinetic equation  $\ln(C_0/C_t) = kt$ , where  $C_0$  represents the initial concentration of MB,  $C_t$  represents the real-time concentration of MB and  $k$  (min<sup>-1</sup>) is the degradation rate constant, the photocatalytic reaction constants of CNF/In<sub>2</sub>S<sub>3</sub> membrane is 0.06765 min<sup>-1</sup>, which is much higher than reported that of In<sub>2</sub>S<sub>3</sub> (0.021 min<sup>-1</sup>)<sup>1</sup>, TiO<sub>2</sub> nanowhisker (0.02658 min<sup>-1</sup>)<sup>2</sup>, and TiO<sub>2</sub>/CdS composites

## Electronic Supplementary Information

( $0.05 \text{ min}^{-1}$ )<sup>3</sup>. The results clearly demonstrate that CNF/In<sub>2</sub>S<sub>3</sub> membrane prepared in this work can achieve excellent photocatalytic capacity.

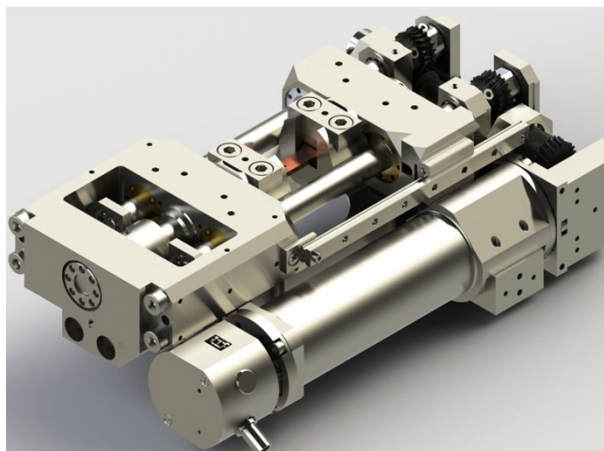

**Fig. S3.** Photo of miniature tensile module.

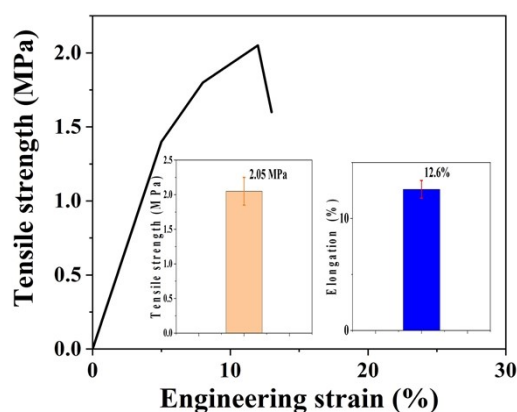

**Fig. S4.** Engineering stress-strain curve of CNF/In<sub>2</sub>S<sub>3</sub> membrane (insets: tensile strength and strain at break).

**Explanation:** Fig. S4 shows the tensile strength and elongation at break by miniature tensile module (Fig. S3). Each result was from three tests to make sure the data accuracy. The tensile strength measures the maximum stress a material can withstand before it yields or breaks completely. The tensile strength of CNF/In<sub>2</sub>S<sub>3</sub> membrane was around 2.05 MPa. In addition, the elongation of CNF/In<sub>2</sub>S<sub>3</sub> membrane was about 12.6%. Hence, these results indicate that CNF/In<sub>2</sub>S<sub>3</sub> membrane possesses the necessary structural robustness and strength to withstand the high-tension winding processes required for industrial module assembly.

## Electronic Supplementary Information

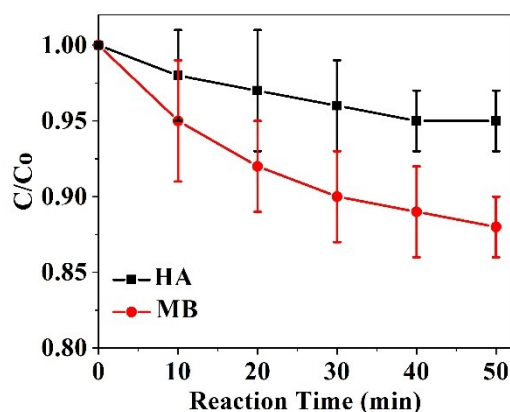

**Fig. S5.** Adsorption of HA and MB by CNF/In<sub>2</sub>S<sub>3</sub> membrane within 50 min.

**Explanation:** Fig. S5 shows adsorption of HA and MB by CNF/In<sub>2</sub>S<sub>3</sub> membrane within 50 min. Only 5% of HA and 12% of MB can be adsorbed by CNF/In<sub>2</sub>S<sub>3</sub> membrane under dark condition, which is significantly lower than that photodegraded by CNF/In<sub>2</sub>S<sub>3</sub> membrane under visible light.

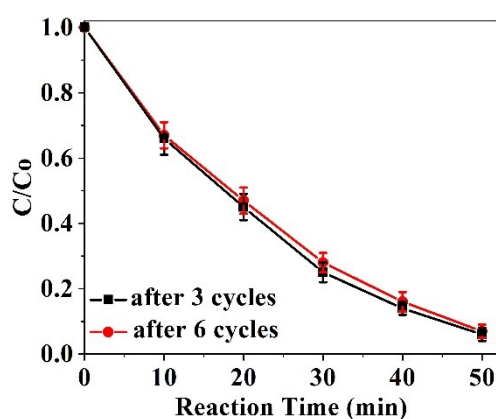

**Fig. S6.** Photodegradation of MB by CNF/In<sub>2</sub>S<sub>3</sub> membrane after 3 cycles and 6 cycles, respectively.

**Explanation:** Fig. S6 shows photodegradation of MB by CNF/In<sub>2</sub>S<sub>3</sub> membrane after 3 cycles and 6 cycles, respectively. It can be found that CNF/In<sub>2</sub>S<sub>3</sub> membrane achieves high photodegradation efficiency even after 6 cycles, demonstrating the stability and reusability of CNF/In<sub>2</sub>S<sub>3</sub> membrane.

## Electronic Supplementary Information

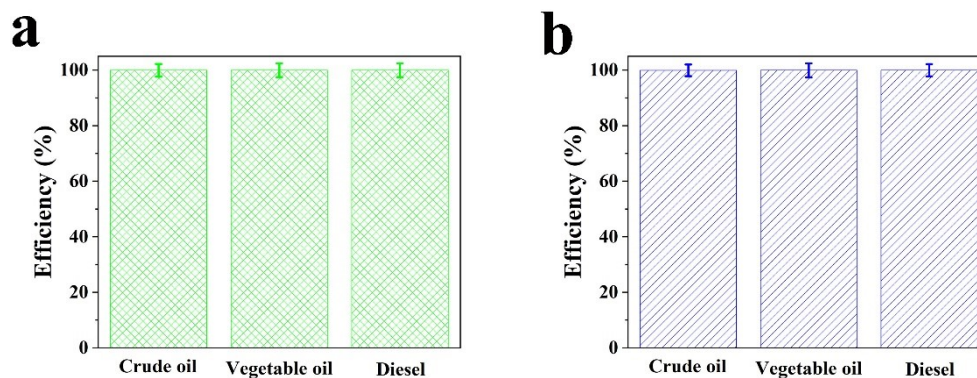

**Fig. S7.** (a) Separation efficiency of different immiscible oil/water mixtures after 3 cycles; and (b) Separation efficiency of different immiscible oil/water mixtures after 6 cycles.

**Explanation:** Fig. S7a and b show the separation efficiency of different immiscible oil/water mixtures after 3 and 6 cycles. No obvious separation efficiency decline can be identified, indicating CNF/ $\text{In}_2\text{S}_3$  membrane can be operated for oil/water separation with high efficiency in a long period.

### Reference

1. R. Lucena, F. Fresno and J. C. Conesa, *Catal. Commun.*, 2012, **20**, 1-5.
2. J. Ng, J. H. Pan and D. D. Sun, *J. Mater. Chem.*, 2011, **21**, 11844-11853.
3. P. Gao, J. Liu, T. Zhang, D. D. Sun and W. Ng, *J. Hazard. Mater.*, 2012, **229–230**, 209-216.
